# Supplementary material for: The Role of CD38 on the Function of Regulatory B Cells in a Murine Model of Lupus
Source: MDPI journal article supplement (doi:10.3390/ijms19102906), 2018-09-25
Supplement: s1 [file s1]

## Supplementary Materials

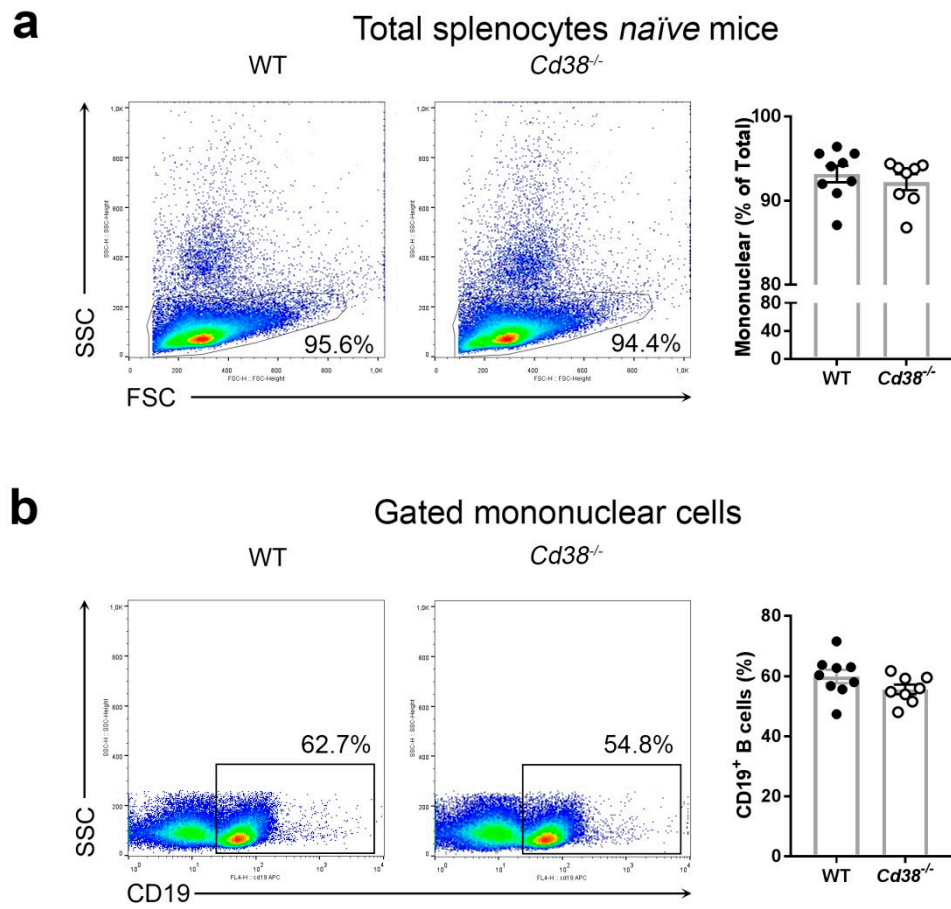

**Figure S1. Related to Figure 1.** Gating strategy for immunophenotyping splenocyte B cells from naïve *Cd38<sup>-/-</sup>* and WT mice before showing CD1d<sup>hi</sup>CD5<sup>+</sup> B cell frequencies in Figure 1. Percentages of mononuclear and total B cells are shown.

# Gating strategy for pDCs from PECs

Total PECs 2 weeks Pristane

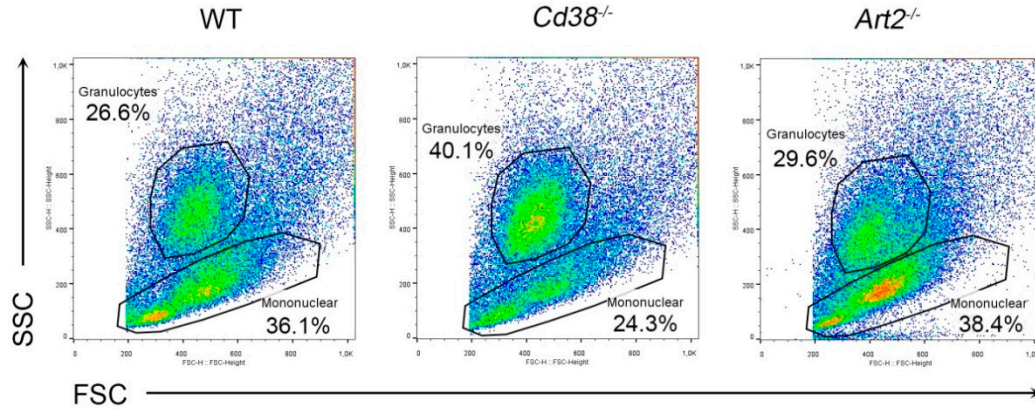

Gated mononuclear cells

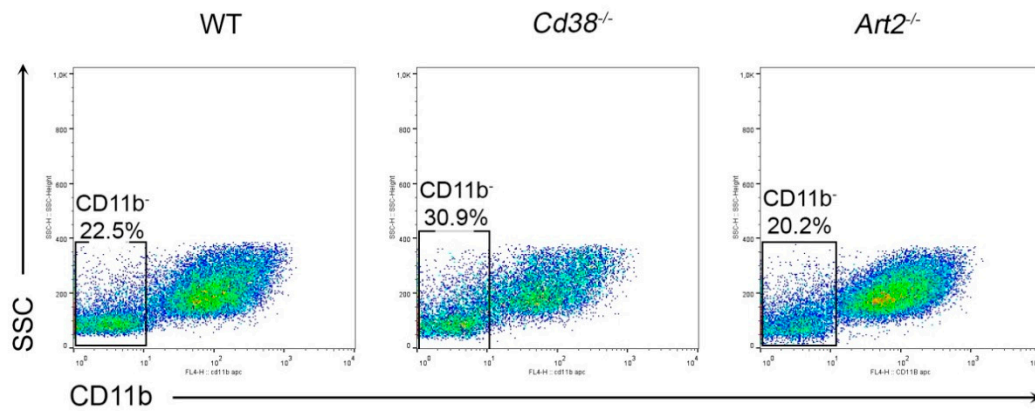

Gated CD11b<sup>-</sup> cells

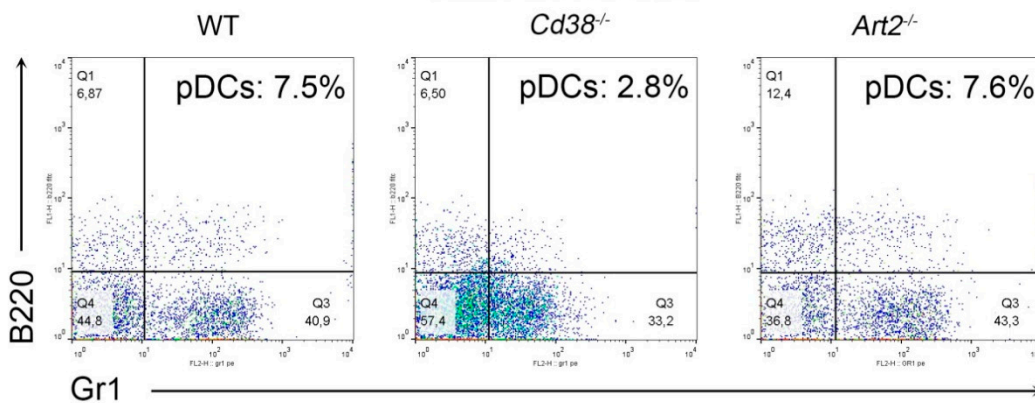

**Figure S2. Related to Figure 4.** Gating strategy for immunophenotyping pDCs from PECs of mice injected with pristane 2 weeks before. pDCs correspond to the double positive cells for Gr1 and B220 of the gated CD11b<sup>-</sup> subpopulation.

# Gating strategy for pDCs from splenocytes

Total splenocytes 2 weeks Pristane

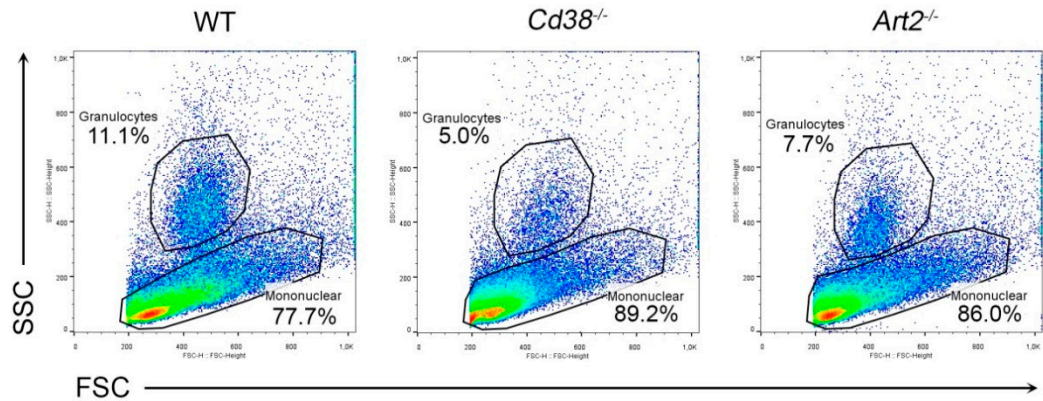

Gated mononuclear cells

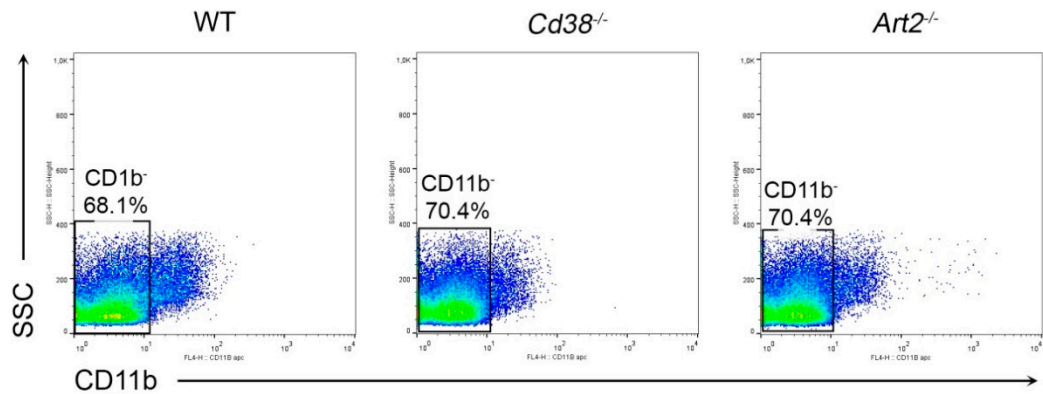

Gated CD11b<sup>-</sup> cells

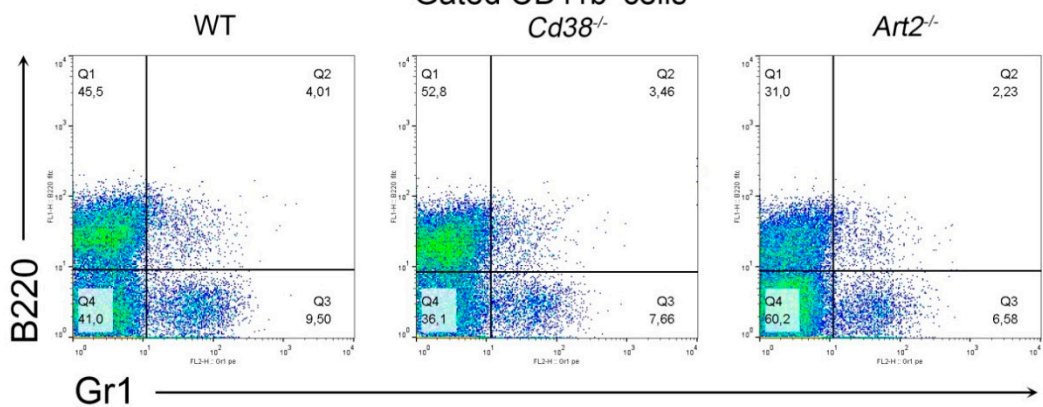

**Figure S3. Related to Figure 4.** Gating strategy for immunophenotyping pDCs from splenocytes of mice injected with pristane 2 weeks before. pDCs correspond to the double positive cells for Gr1 and B220 of the gated CD11b<sup>-</sup> subpopulation.
